# Supplementary material for: Multiple Modulation of Acid-Sensing Ion Channel 1a by the Alkaloid Daurisoline
Source: PubMed Central journal article supplement (PMC6722837; doi:10.3390/biom9080336), 2019-08-02
Supplement: biomolecules-09-00336-s001.pdf [file biomolecules-09-00336-s001.pdf]

## 1 Supplementary Materials

2 We simulated the kinetic of proton-activated currents at the ASIC1a channel  
 3 (taking into account the rate of change of the solution) using the method of  
 4 numerical solution of a system of kinetic equations using an algorithm similar to  
 5 that described [1]. The accuracy of this modeling method was verified by  
 6 comparing our calculations with analytical solutions for a three-state [2] and  
 7 four-state [3] models of receptor activation by the ligand. Comparison of  
 8 dose-response curves fitted to the maximum amplitude of the current generated by  
 9 our program with these analytical solutions showed complete coincidence of  
 10 numerical simulation predictions (the relative amplitude error was less than 10<sup>-7</sup>%  
 11 over the entire range of ligand concentrations (10<sup>-9</sup>–10<sup>-3</sup> M). Thus, our algorithm can  
 12 be successfully used to simulate the currents of ligand-activated receptors,  
 13 including rapidly activated, such as ASIC channels.

14 As is known from the literature the activation of ASICs may occur after the  
 15 binding of numerous protons (≤16) [4,5]. At first, to simulate the proton dependence  
 16 of ASIC1a activation, we developed a theoretical Model 1 describing several  
 17 consecutive closed states, which can eventually turn into an open or desensitized  
 18 state:

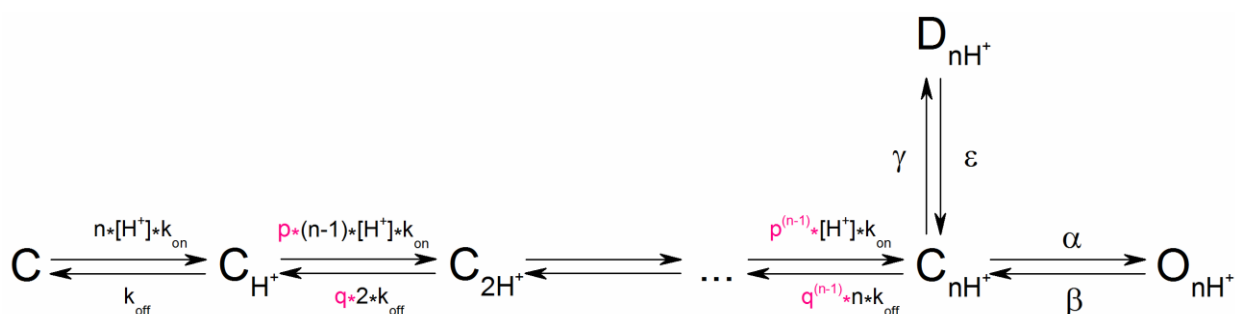

19

20 **Scheme S1.** Model 1/2. Model 2 with introduced cooperativity factors (*p* and *q* < 1).

21 The kinetic constants  $k_{on} = 2 \times 10^9 \text{ M}^{-1}\text{s}^{-1}$  and  $k_{off} = 10^3 \text{ s}^{-1}$  for protons binding to  
 22 ASIC1a were suggested early in literature by [6]. Other constant: The rate constant  
 23 of the channel opening  $\alpha = 1000 \text{ s}^{-1}$ ; the rate constant of the channel closing  $\beta = 1000$   
 24  $\text{ s}^{-1}$ ; the rate constants of the channel transition to desensitization  $\gamma = 10 \text{ s}^{-1}$ , and the  
 25 rate constants of the channel transition from desensitization  $\epsilon = 0.02 \text{ s}^{-1}$ , were chosen  
 26 on the basis of the speed and magnitude of the desensitization current decrease.  
 27 The coefficients "p" and "q", highlighted in red, reflect the cooperativity of the  
 28 interaction of protons with the channel and they were introduced into the Model 2  
 29 (see description below).

30 We investigated dose-dependence of the probability of the channel opening  
 31 for Model 1 with 3, 6, and 9 identical binding sites (M1-3, M1-6, M1-9). This pool of  
 32 sites number was chosen in view of homotrimeric ASIC1a organization. All three  
 33 models reproduced similar shape of the current generated by various proton

34 concentrations from standard conditioning pH 7.4 (change solution time is 50 ms;  
35 time application is 1 s) (Figure S1A).

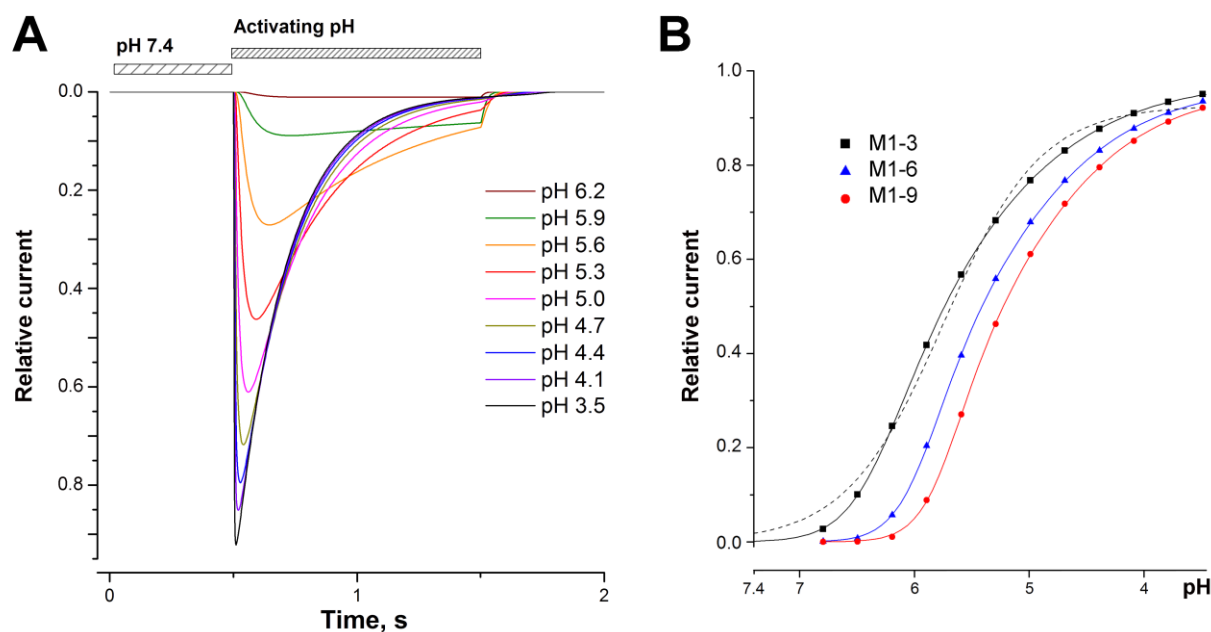

36  
37 **Figure S1.** (A) The set of generated traces predicted for a model M1-9. (B) The dose  
38 dependence curves obtained for models M1-3, M1-6, M1-9 by fitting with equation F<sub>2</sub> (solid  
39 lines) and by logistic equation F<sub>1</sub> for model M1-3 (dash line).

40 The pH-dependence of the channel activation was analyzed for all three  
41 models (Figure S1B). In all cases the dependences of the maximum amplitude of the  
42 current versus proton concentration keep an asymmetrical shape of curve like the  
43 experimental curve, and poorly fitted by the logistic equation. Otherwise a reliable  
44 fitting of we fitted the dose-response with the following equation F<sub>2</sub>:

$$45 F(x) = A / (1 + (x/[pH_{501}])^{n_{H1}}) \times (1 + (x/[pH_{502}]^{n_{H2}})).$$

46 The dose-dependence activation of all models is perfectly fitted by this equation.  
47 The Hill coefficients obtained by the fittings are shown in Table S1.

48 **Table S1.** The Hill coefficients trend for selected models.

|                 | M1-3 | M1-6 | M1-9 |
|-----------------|------|------|------|
| n <sub>H1</sub> | 1.71 | 2.17 | 2.35 |
| n <sub>H2</sub> | 0.61 | 0.68 | 0.70 |

49 The value of the n<sub>H2</sub> always remains less than one (as in the experimental  
50 data). The value n<sub>H1</sub>, which determines the steepness of the left part of the  
51 proton-dependence curve of activation (Figure S1B) has a tendency to grow when a  
52 number of proton sites in Model 1 is increased, but this tendency is not enough to  
53 achieve higher n<sub>H1</sub> values. Therefore, the Model 1 without modification failed to  
54 obtain high n<sub>H1</sub> values close to experimental (more than 6) by a simple increasing of  
55 proton binding sites number.

56 In order to obtain higher n<sub>H1</sub>, we designed the Model 2 with two parametric  
57 coefficients p and q. We assumed that the binding of protons is a cooperative

58 process, causing the conformational rearrangements in the channel that were  
 59 described [7] as a collapse of the pocket where protons bind. As a result, each  
 60 successive proton will have different binding/dissociation characteristics than the  
 61 previous one. Thus, we believed that the rate constants of both binding and  
 62 dissociation decrease with each subsequent process of interaction of the proton  
 63 with the channel and introduced the cooperativity coefficient  $p < 1$  (for binding  
 64 constants) and coefficient  $q$  (for dissociation constants) that always less than  $p$ .

65 As a result, we managed to achieve an increase in the value of  $n_{H1}$  (Figure  
 66 S2A, B). For the M2-6,  $n_{H1}$  does not exceed a value of 4.5 for any values of the “ $p$ ”  
 67 and “ $q$ ” coefficients (Figure S2A). For the M2-9 model, the value of  $n_{H1}$ , about 6.4,  
 68 is achieved only in a narrow range of  $q$  and  $p$  values. For further modeling, we take  
 69 the  $q$   $p$  and values of the main maximum (Figure S2B,C). Thus, we assume that the  
 70 number of proton-binding sites equal to nine is a necessary and sufficient, and best  
 71 calculation is produced for  $q$  coefficient of 0.65 and  $p$  coefficient of 0.75 (Figure  
 72 S2D).

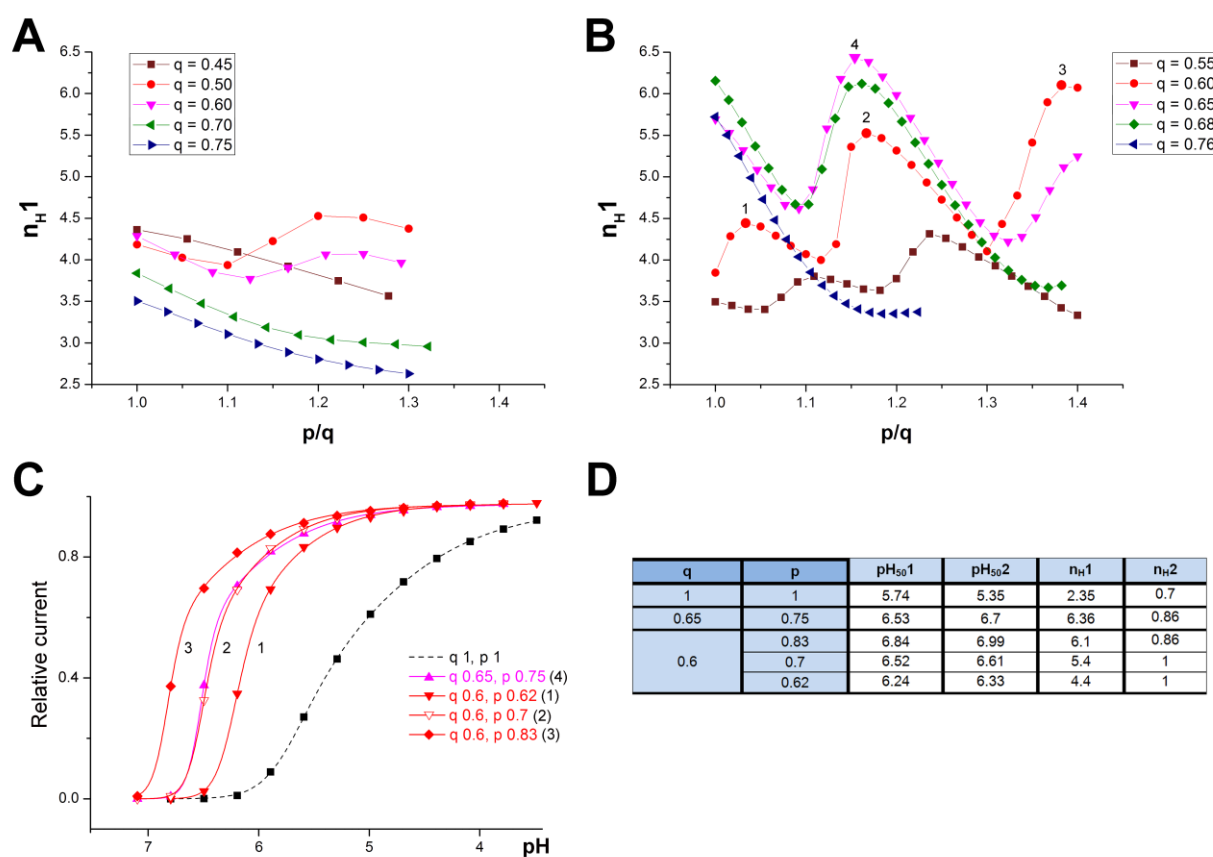

73

74 **Figure S2.** Optimization of the models. (AB) of the Plot of different variants of the  $q$  and  $p$   
 75 coefficients affecting the  $n_{H1}$  coefficient in the model M2-6—panel (A) and model  
 76 M2-9—panel (B). Dose-dependence curves (C) and tabular data (D) obtained by fitting  
 77 with equation  $F_2$  for M2-9 model with various cooperativity coefficients  $q$  and  $p$  (points 1–4  
 78 from Panel B) vs. control  $q = p = 1$ .

79 It should be noted, that the M2-9 model with selected p and q values 0.75 and  
 80 0.65, respectively, give the satisfactory result for  $n_{H1}$  and  $n_{H2}$  but false  $pH_{501}$  and  
 81  $pH_{502}$  values. Experimental  $pH_{501}$  is greater than  $pH_{502}$  (Figure 6a in main text)  
 82 while this model produce more high value for  $pH_{502}$  (Figure S2D). To overcome this  
 83 inconsistency, we introduced into Model 2 an additional proton binding site with  
 84 and noncooperative less affine site (Model 3; see also the scheme and text in the  
 85 main results).

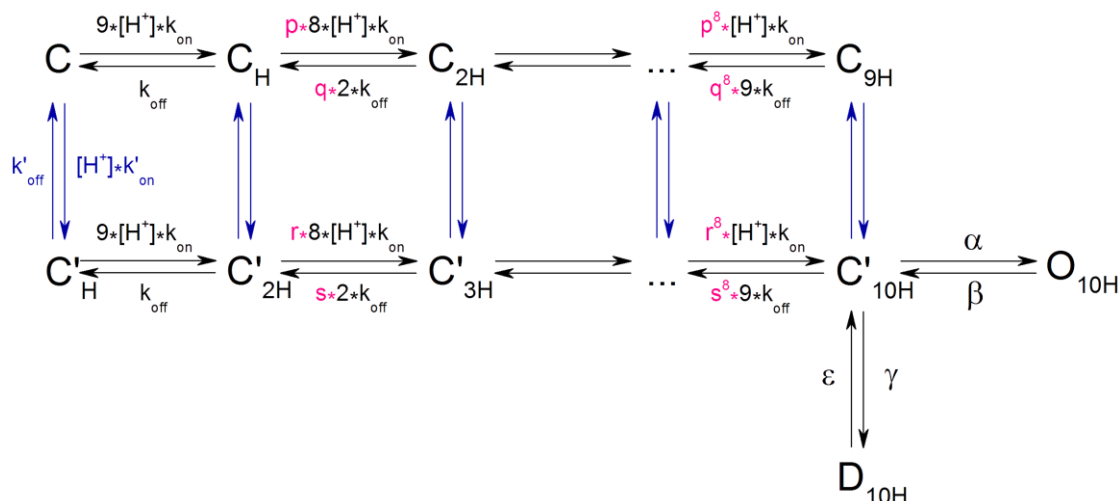

86  
87

**Scheme S2.** Model 3

88

We introduced the following assumptions into this model:

89

1) The tenth site is low affine,  $k'_{on} = 2 \times 10^9 M^{-1}s^{-1}$  and  $k'_{off} = 1.2 \times 10^3 s^{-1}$  (the last constant was taken based on the difference between  $pH_{501}$  and  $pH_{502}$  in the experiment);

90

2) Proton binding in the main (highly cooperative) pool does not affect proton binding in the low affinity region;

92

3) Proton binding in the low affinity site also does not affect proton binding in the cooperative pool, i.e.,  $p = r$ ,  $q = s$ .

94

95

Under these assumptions, the entire dose-dependence is shifted to the right in the region of acidic pH. Returning the curve to the left is possible by increasing the cooperativity of the binding by increasing the coefficients of cooperativity p and r. This allowed us to obtain a dose-dependence, which is fitted by equation F<sub>2</sub> with parameter values close to the experimental ones (see Table S2).

97

98

99

100

**Table S2.** Comparison of the parameters of the pH dependence of the model M3-10 activation with non-fixed and fixed per unit coefficient  $n_{H2}$ .

101  
102

|                          | $pH_{501}$      | $pH_{502}$      | $n_{H1}$      | $n_{H2}$        |
|--------------------------|-----------------|-----------------|---------------|-----------------|
| M3-10 ( $n_{H2}$ free)   | 6.62            | 6.61            | 5.6           | 0.77            |
| M3-10 ( $n_{H2}$ fixed)  | 6.65            | 6.53            | 6.4           | 1               |
| Oocyte experimental data | $6.67 \pm 0.01$ | $6.59 \pm 0.01$ | $6.7 \pm 0.5$ | $0.96 \pm 0.06$ |

103           It should be noted that, although the parameters of the fitting of the model  
104 agree well with the experimental data, the coefficient  $n_{H1}$  becomes smaller. This can  
105 be compensated for by increasing the number of highly operational sites, or by  
106 fixing the second coefficient when fitted by equation F<sub>2</sub>. Since the experimental data  
107 showed the second coefficient very close to 1, we adjusted the data of the M3-10  
108 model with the coefficient  $n_{H2}$  fixed to the value 1. These fittings are shown in the  
109 main text and in Figure 6.

110

111 **References**

- 112 1. Benveniste, M.; Clements, J.; Vyklický, L.; Mayer, M.L. A kinetic analysis of the modulation of  
113 N-methyl-D-aspartic acid receptors by glycine in mouse cultured hippocampal neurones. *J. Physiol.* **1990**,  
114 428, 333–357, doi:10.1113/jphysiol.1990.sp018215.
- 115 2. Colquhoun, D.; Hawkes, A.G. Relaxation and fluctuations of membrane currents that flow through  
116 drug-operated channels. *Proc. R. Soc. London. Ser. B. Biol. Sci.* **1977**, 199, 231–262,  
117 doi:10.1098/rspb.1977.0137.
- 118 3. Patneau, D.K.; Mayer, M.L. Structure-activity relationships for amino acid transmitter candidates acting at  
119 N-methyl-D-aspartate and quisqualate receptors. *J. Neurosci.* **1990**, 10, 2385–99, doi:  
120 10.1523/JNEUROSCI.10-07-02385.1990.
- 121 4. Ishikita, H. Proton-Binding Sites of Acid-Sensing Ion Channel 1. *PLoS One* **2011**, 6, e16920,  
122 doi:10.1371/journal.pone.0016920.
- 123 5. Vullo, S.; Bonifacio, G.; Roy, S.; Johnner, N.; Bernèche, S.; Kellenberger, S. Conformational dynamics and  
124 role of the acidic pocket in ASIC pH-dependent gating. *Proc. Natl. Acad. Sci.* **2017**, 114, 3768–3773,  
125 doi:10.1073/pnas.1620560114.
- 126 6. Gründer, S.; Pusch, M. Biophysical properties of acid-sensing ion channels (ASICs). *Neuropharmacology*  
127 **2015**, 94, 9–18, doi:10.1016/j.neuropharm.2014.12.016.
- 128 7. Yoder, N.; Yoshioka, C.; Gouaux, E. Gating mechanisms of acid-sensing ion channels. *Nature* **2018**, 555,  
129 397–401, doi:10.1038/nature25782.
- 130
